# Supplementary material for: Oxygen deficient α-Fe2O3 photoelectrodes: a balance between enhanced electrical properties and trap-mediated losses
Source: PubMed Central journal article supplement (PMC5497273; doi:10.1039/c5sc00423c), 2015-04-28
Supplement: SC-006-C5SC00423C-s001.pdf [file SC-006-C5SC00423C-s001.pdf]

## Oxygen Deficient $\alpha$ -Fe<sub>2</sub>O<sub>3</sub> Photoelectrodes: A Balance Between Enhanced Electrical Properties and Trap-Mediated Losses

Mark Forster,<sup>a</sup> Richard J. Potter,<sup>b</sup> Yichuan Ling,<sup>d</sup> Yi Yang, David R. Klug,<sup>c</sup> Yat Li<sup>d</sup>  
and Alexander J. Cowan<sup>a\*</sup>

Electronic supplementary information

### Contents:

#### **1. Experimental**

*1.1 Materials*

*1.2 Apparatus*

#### **2. Characterisation and supporting data**

*2.1 UV-Vis*

*2.2 XRD*

*2.3 SEM*

*2.4 Scheme of TA assignments at  $\lambda > 600$  nm and 580 nm*

*2.5 Steady state photocurrents measurements at various applied potentials*

*2.6 Overlay of the decay of the TA with the integrated TPC in Fe<sub>2</sub>O<sub>3</sub> at 1.4 V<sub>RHE</sub>*

*2.7 Mott-Schottky and space charge layer width calculations*

*2.8 Linear sweep voltammograms in the presence of H<sub>2</sub>O<sub>2</sub> hole scavenger*

*2.9 Fitting parameters for 700 nm TA signal*

*2.10 Plot of photocurrent vs. 700 nm hole intensity*

*2.11 Photocurrents for Al<sub>2</sub>O<sub>3</sub> coated Fe<sub>2</sub>O<sub>3</sub>*

*2.12 Photohole (700 nm) intensities before and after Al<sub>2</sub>O<sub>3</sub> coating*

*2.13 Fitting of TA trace recorded at (a) 700 nm (photoholes) in  $\alpha$ -Fe<sub>2</sub>O<sub>3-x</sub> in the presence of hydrogen peroxide hole scavenger*

## **1. Experimental**

### **Synthesis of $\alpha$ -Fe<sub>2</sub>O<sub>3</sub> and $\alpha$ -Fe<sub>2</sub>O<sub>3-x</sub>**

Briefly,  $\beta$ -FeOOH nanowire films were first prepared on a FTO substrate through hydrolysis of FeCl<sub>3</sub> (0.15 M) in a high ionic strength (1 M NaNO<sub>3</sub>), and low pH value (pH 1.5, adjusted by HCl) environment at 95°C for 4 hr.  $\beta$ -FeOOH films were then sintered in air at 550°C for 2 hr to form  $\alpha$ -Fe<sub>2</sub>O<sub>3</sub>. For preparing  $\alpha$ -Fe<sub>2</sub>O<sub>3-x</sub>,  $\beta$ -FeOOH films were annealed in a tube furnace in an oxygen-deficient atmosphere (N<sub>2</sub> + air). The tube furnace was vacuumed down to 15 Torr, and then refilled with ultrahigh purity N<sub>2</sub>. The sintering of  $\beta$ -FeOOH was carried out at 550°C for 2 hours at 740 Torr with a continuous N<sub>2</sub> flow (50 sccm), XRD confirmed that the  $\beta$ -FeOOH nanowires were completely converted into hematite for both the  $\alpha$ -Fe<sub>2</sub>O<sub>3</sub> and  $\alpha$ -Fe<sub>2</sub>O<sub>3-x</sub> samples (figure S2), in line with the past study. The morphology of the films have also been examined by SEM (figure S3) and have been found to be similar for both the  $\alpha$ -Fe<sub>2</sub>O<sub>3-x</sub> and  $\alpha$ -Fe<sub>2</sub>O<sub>3</sub> samples, similar to those previously reported (*ca.* 70 nm by 700 nm).<sup>19</sup> Mott-Schottky analysis confirms the expected higher donor density in the oxygen deficient film (figure S7). Samples were found to be suitably stable for regular use in TA measurements over a 3 month period with no noticeable detrition in activity.

### **Al<sub>2</sub>O<sub>3</sub> ALD deposition**

Al<sub>2</sub>O<sub>3</sub> was deposited by thermal ALD using trimethyl-aluminium (TMA) and water in an Oxford Instruments OpAL reactor. The reactor was modified by the addition of a process controlled ‘hold’ valve between the pump and the process chamber, enabling precursor ‘soak’ steps. Soak steps were used in the process to ensure good film density and to promote conformal coating of the highly textured hematite surface. Coating was carried out at a low process temperature of 120°C, selected to avoid accidental modification of the hematite samples. Films were deposited using 10 cycles of ALD targeting ~1 nm of Al<sub>2</sub>O<sub>3</sub>, using the following sequence:

{(50 ms TMA Dose)(10 s TMA hold)(10 s purge)(30 ms H<sub>2</sub>O)(10 s H<sub>2</sub>O hold)(10 s purge)}

The growth rate of the Al<sub>2</sub>O<sub>3</sub> was estimated using a Rudolph Auto EL IV ellipsometer operating at 633 nm using silicon ‘witness’ samples. This confirmed that 10 cycles gave close to 1 nm of Al<sub>2</sub>O<sub>3</sub>. In line with previous reports,<sup>1</sup> the effect of Al<sub>2</sub>O<sub>3</sub> layer is found to be retained for at least 20 minutes in 1 M NaOH indicating a reasonable level of stability and we are able to obtain kinetic data at up to two wavelengths.

### **Electrochemical measurements**

A custom designed H-photoelectrochemical cell containing an  $\alpha$ -Fe<sub>2</sub>O<sub>3</sub> photoanode, illuminated (*ca.* 0.5 cm<sup>2</sup> illuminated area) from the electrolyte-electrode (EE) side, a platinum gauze counter electrode and a 3 M KCl Ag/AgCl reference electrode (SSE, Bioanalytical Systems Ltd.) protected from the electrolyte solution by a KCl double junction was used in all experiments. Potentials quoted in the text are converted to RHE using equation 1.

$$E_{\text{RHE}} = E_{\text{Ag/AgCl}} + 0.059\text{pH} + E^0_{\text{Ag/AgCl}} \quad [1]$$

Where  $E^0_{\text{Ag/AgCl}} = 0.205$  V at room temperature. The electrolyte used throughout was 1 M NaOH (Aldrich, pH 13.6) prepared with Milli-Q water (Millipore Corp, 18.2 M $\Omega$  cm at 25°C) and prior to all experiments it was thoroughly degassed with a stream of argon for at least 20 minutes. Hole scavenging experiments were carried out in the presence of 0.5 M H<sub>2</sub>O<sub>2</sub> in the electrolyte. Due to the low stability of Al<sub>2</sub>O<sub>3</sub> at high pH values the electrolyte was purged thoroughly prior to addition to the electrochemical cell which was held under an argon atmosphere. Linear sweep voltammograms were recorded both in the dark and under illumination with a 75 W Xe lamp (*ca.* 10 mW cm<sup>-2</sup>) using either a PalmSens<sup>3</sup> (PalmSensBV) or a Minostat (Thomson Scientific) potentiostat typically at 5 mV s<sup>-1</sup> unless otherwise stated.

## Transient measurements

The TA apparatus has been described elsewhere.<sup>2</sup> Briefly, the third harmonic of a Nd:YAG laser (Continuum, Surelite I-10, 355 nm, 4-6 ns pulse width) operating at 0.33 Hz is the UV excitation source. The repetition rate of the laser was chosen to ensure that all photogenerated charge carriers had fully decayed prior to the next excitation event. A laser intensity of *ca.* 200  $\mu\text{J cm}^{-2}$  at 355 nm was incident on the photoelectrochemical cell, leading to an intensity of *ca.* 100  $\mu\text{J cm}^{-2}$  at the sample. We note that high pump laser intensities can lead to excessively high electron-hole recombination rates and in mind of this we use the relatively low excitation power of *ca.* 100  $\mu\text{J cm}^{-2}$  throughout, in order to limit/eliminate this effect. There are a number of past studies on hematite regarding these laser intensities which give us confidence that the parameters used here are relevant in providing useful information.<sup>3</sup> A 75 W Xe lamp (OBB Corp.) coupled to monochromator (OBB Corp., set to 4 nm resolution) acts as the probe light and the change in optical density of the sample is calculated by measuring the transmitted light using a Si Photodiode (Hamamatsu) and a homemade amplification system coupled to both an oscilloscope (Textronix TDS 220) and data acquisition card (National Instruments NI-6221). In order to generate the TA spectra at a range of biases, 200 laser shots per wavelength were recorded. Accurate kinetic traces were recorded in a separate experiment using a minimum of 500 shots per wavelength. All TA experiments were carried out on the PEC cell used for electrochemical measurements, under potentiostatic control at the potential indicated in the text. Transient photocurrent measurements were recorded using the same apparatus with the light from the Xe probe lamp blocked. The current was obtained by measuring the voltage drop across a 47 ohm resistor in series with the working and counter electrode.

## 2. Supporting data

### 2.1 UV-Vis

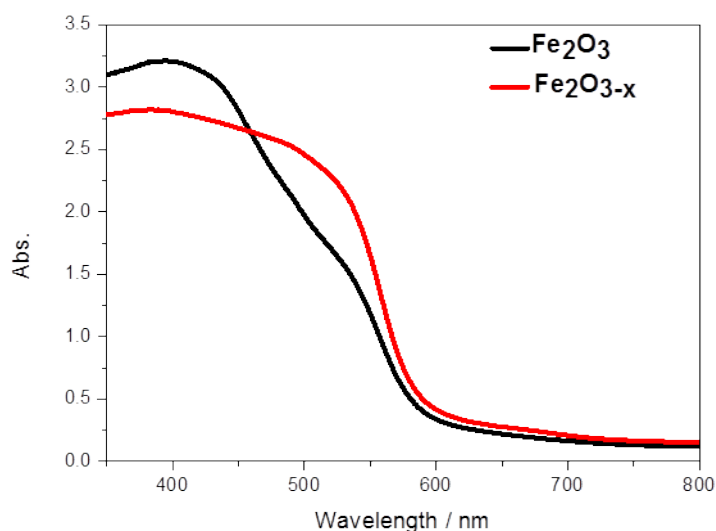

**Figure S1.** UV-Vis spectra of Fe<sub>2</sub>O<sub>3</sub> and Fe<sub>2</sub>O<sub>3-x</sub>

## 2.2 XRD

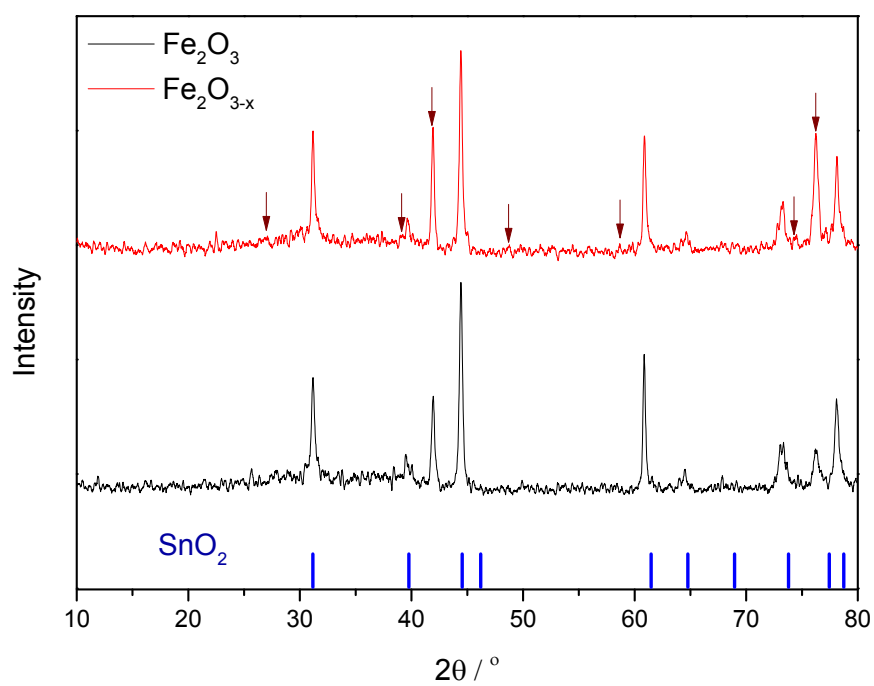

**Figure S2.** XRD of  $\text{Fe}_2\text{O}_3$  and  $\text{Fe}_2\text{O}_{3-x}$  collected on FTO substrate using a Panalytical X'Pert PRO HTS X-Ray Diffractometer. Diffraction patterns were recorded from 10 to 80° 2 theta with a step size of 0.017° at 1.6° per minute.

### 2.3 SEM

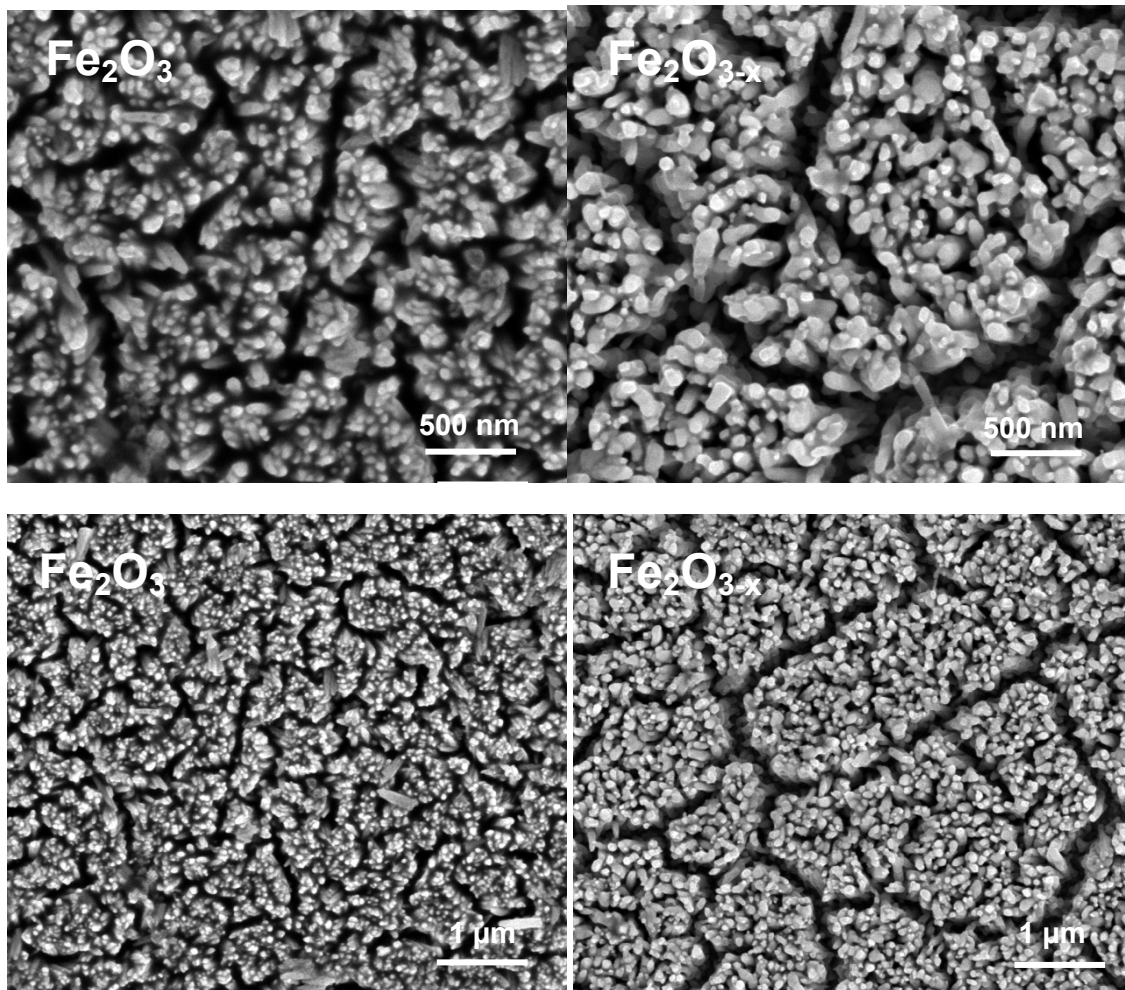

**Figure S3.** Scanning electron microscopy images of  $\text{Fe}_2\text{O}_3$  and  $\text{Fe}_2\text{O}_{3-x}$ .

## 2.4 Scheme of TA assignments at $\lambda > 600$ nm and 580 nm

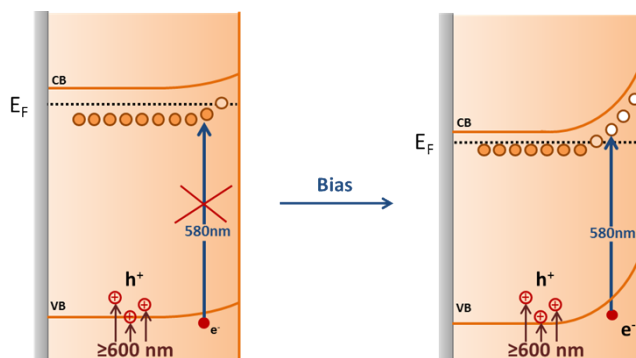

**Figure S4.** Schematic showing TA assignment in  $\alpha\text{-Fe}_2\text{O}_3$  of feature at  $\lambda > 600$  nm to photoholes and bleach at  $\sim 580$  nm to photo-electron trapping at localized states which is primarily occurring on the sub-microsecond timescale, in line with Barosso *et al.*<sup>4</sup>

Schematic showing the transitions responsible for the broad positive transient absorption measured at wavelengths greater than 600 nm in all of the spectra the and bleach (decrease in optical density) centered at *ca.* 580 nm which is seen to increase in magnitude with applied bias. It has been proposed that the feature at this wavelength is due to localized states close to the band edge, possibly related to the presence of oxygen vacancies.<sup>4,5</sup>

## 2.5 Steady state photocurrents measurements at various applied potentials

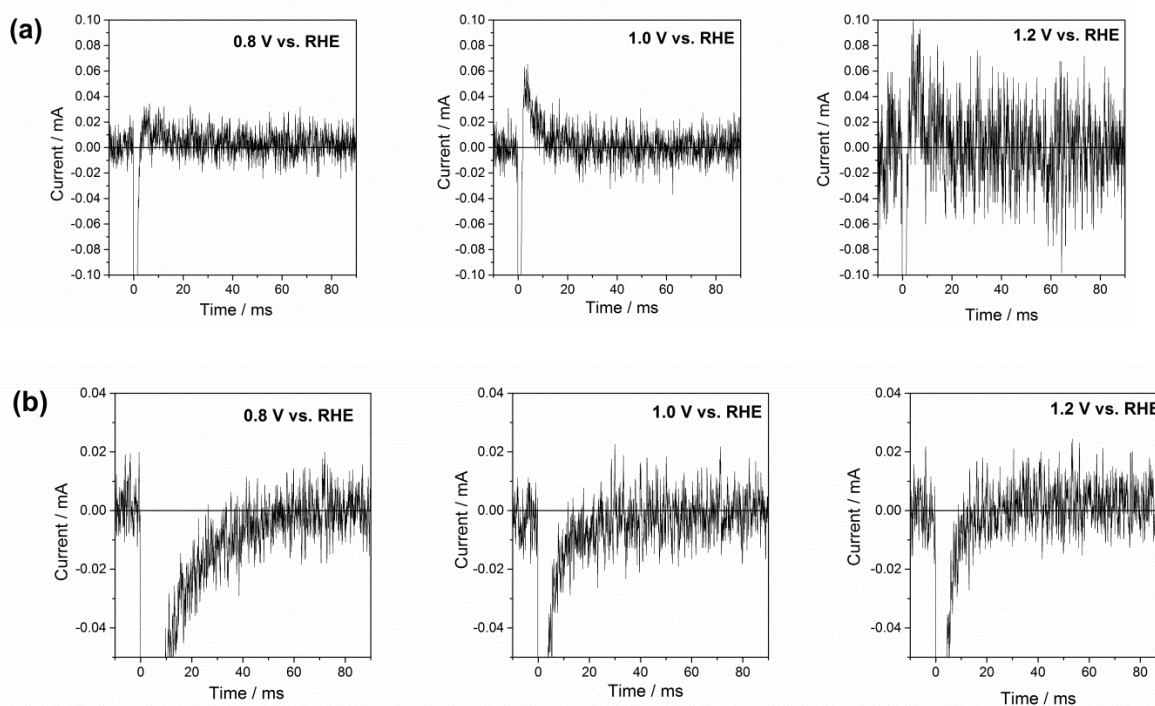

**Figure S5.** Transient photocurrents measurements at various applied potentials for a)  $\text{Fe}_2\text{O}_{3-x}$  showing no charge re-injected from external circuit and b)  $\text{Fe}_2\text{O}_3$  showing positive signal on slower timescales where charge is re-injected due to bulk electron-hole recombination on the ms timescale.

### 2.6 Overlay of the decay of the TA with the integrated TPC in $\text{Fe}_2\text{O}_3$ at 1.4 $V_{\text{RHE}}$

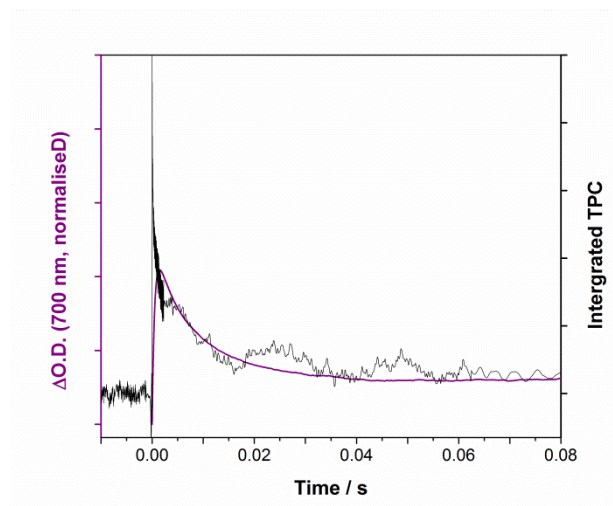

**Figure S6.** Overlay of the decay of the TA with the integrated TPC in  $\text{Fe}_2\text{O}_3$  at 1.4 V (vs. RHE) in 1M NaOH with the photoanodes excited from the electrolyte/electrode side with a UV laser pulse (355 nm, 0.33 Hz).

An overlay of the kinetics of charge reinjection (TPC) and hole decay (TA) on  $\alpha\text{-Fe}_2\text{O}_3$  ( $\tau = 10$  ms at 1.4  $V_{\text{RHE}}$ ) shows an excellent agreement indicating that bulk electrons are recombining with the accumulated photoholes measured in the TA experiment, leading to reinjection of electrons from the external circuit.

## 2.7 Mott-Schottky and space charge layer width calculations

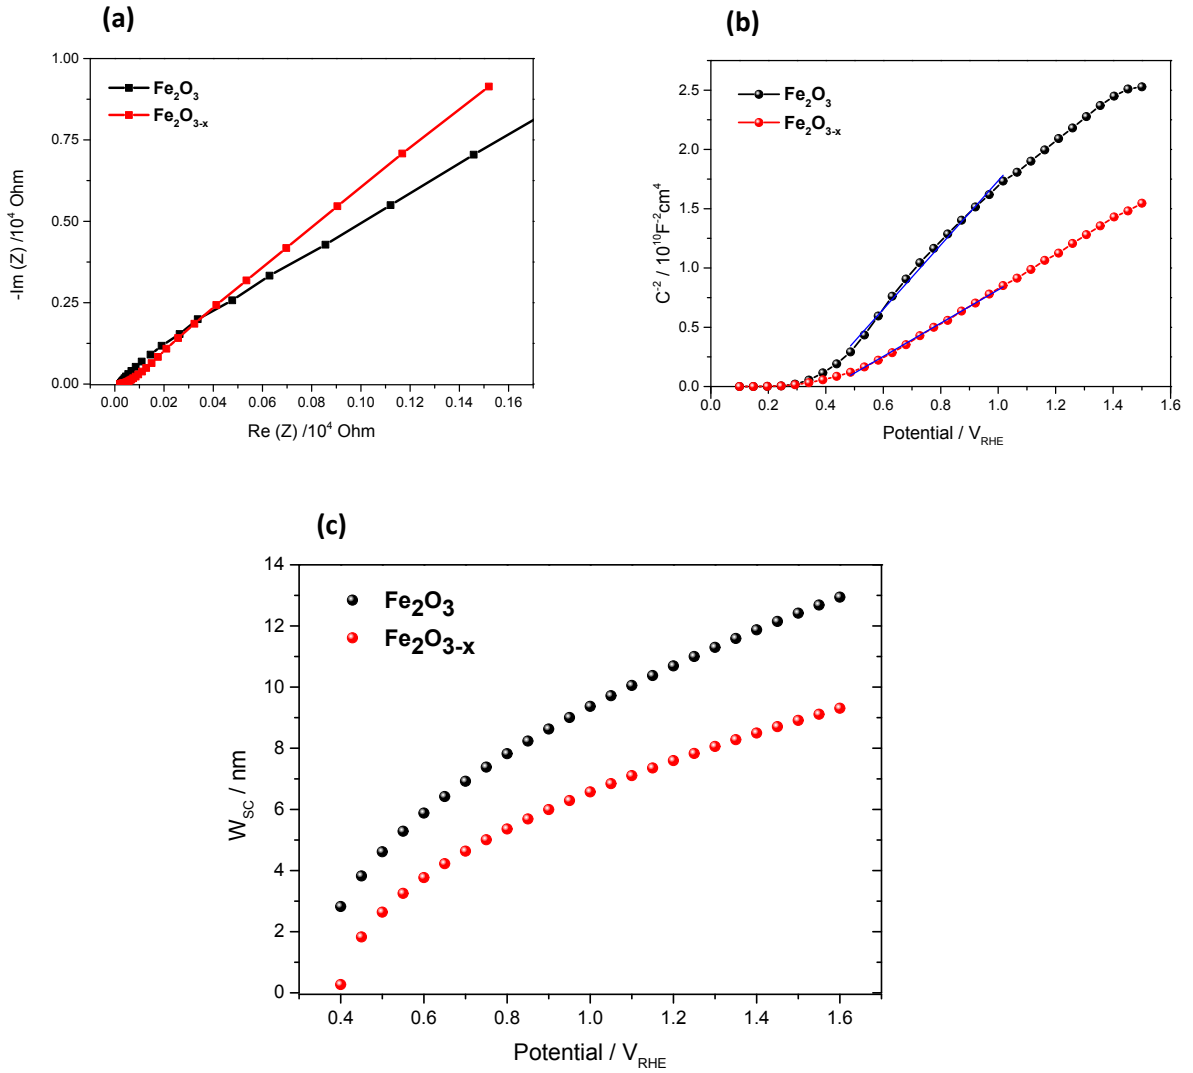

**Figure S7.** (a) Nyquist impedance plots and (b) Mott-Schottky plots of  $\alpha\text{-Fe}_2\text{O}_3$  giving  $N_d = 6.4 \times 10^{19} \text{ cm}^{-3}$  and  $E_{\text{FB}} = 0.34 \text{ V}$  and  $\alpha\text{-Fe}_2\text{O}_{3-x}$  giving  $N_d = 1.2 \times 10^{20} \text{ cm}^{-3}$  and  $E_{\text{FB}} = 0.40 \text{ V}$ . (c) Space charge layer width calculations.

Great care should be taken when interpreting Mott-Schottky data from highly nanostructured films such as those under study here. Nonetheless the relative change in donor density and the measured flat band potentials are of significance. To provide an indication of how the level of  $V_0$  modifies the width of the space charge layer when under a positive bias, and hence the strength of the electric field close to the SCLJ we have calculated representative values of space charge layer width,  $W_{\text{SC}}$ , for films held at different potentials anodic of flat band (Fig S7c) using the following equation with  $E$  being the applied potential:<sup>6</sup>

$$W_{\text{SC}} = \sqrt{\frac{2\epsilon\epsilon_0}{qN_D}(E - E_{\text{FB}})}$$

With the donor densities and flatband potentials obtained to be ( $\alpha\text{-Fe}_2\text{O}_{3-x}$   $N_d = 1.2 \times 10^{20} \text{ cm}^{-3}$ ,  $E_{\text{FB}} = 0.40 \text{ V}$  and  $\alpha\text{-Fe}_2\text{O}_3$   $N_d = 6.4 \times 10^{19} \text{ cm}^{-3}$ ,  $E_{\text{FB}} = 0.34 \text{ V}$ ).<sup>7</sup>



These calculations show that the large increase in  $N_d$  in the  $\alpha\text{-Fe}_2\text{O}_{3-x}$  electrode significantly decreases the width of the space charge layer ( $W_{sc}$ ) which is calculated to go from 12 nm for  $\alpha\text{-Fe}_2\text{O}_3$  to 8 nm for  $\alpha\text{-Fe}_2\text{O}_{3-x}$  at 1.4 V. Due to the limited stability of the  $\text{Al}_2\text{O}_3$  layer in the electrolyte Mott-Schottky analyses were not completed for the ALD coated samples.

From the absorption spectrum at 355 nm and the known pump light intensity of *ca.*  $100 \mu\text{J cm}^{-2}$  we can estimate the photo-generated carrier density and compare it to the  $N_d$ . We calculate the number of incoming photons to be on the order of  $1.78 \times 10^{14} \text{ cm}^{-2}$  demonstrating that expected oxygen vacancy concentration (assumed to be the difference in  $N_d$ ) is much greater than the photo-generated charge carrier density.

## 2.8 Linear sweep voltammograms in the presence of $\text{H}_2\text{O}_2$ hole scavenger

In the presence of  $0.5 \text{ M H}_2\text{O}_2$  we observe a photocurrent at potentials as low as 0.7 VRHE on both  $\alpha\text{-Fe}_2\text{O}_3$  and  $\alpha\text{-Fe}_2\text{O}_{3-x}$  confirming that (i) initial charge separation is occurring to some degree in both materials at potentials well below the water oxidation photocurrent onset potential and (ii) that in both samples the photoholes are able to reach the surface to participate in oxidation reactions. The significantly higher photocurrent for the oxygen deficient sample in the presence of  $\text{H}_2\text{O}_2$  (*ca.*  $\times 2$ ) is in line with expectations that the greater degree of band bending in  $\text{Fe}_2\text{O}_{3-x}$  enables higher initial charge separation efficiencies. It is significant to note however that although this measurement indicates that the initial charge separation efficiency in  $\text{Fe}_2\text{O}_{3-x}$  is approximately  $\times 2$  that of  $\text{Fe}_2\text{O}_3$  this is itself is not sufficient to explain the complete lack of water splitting activity on  $\text{Fe}_2\text{O}_3$ . This is in good agreement with Figure 3 of the main text which also shows that a significant population of photoholes remain in  $\text{Fe}_2\text{O}_3$  on the micro- to millisecond timescale in NaOH at 1.4  $\text{V}_{\text{RHE}}$ .

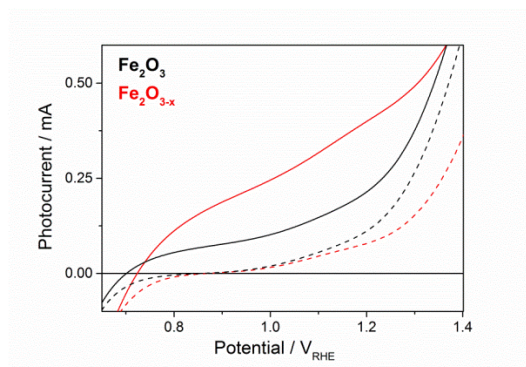

**Figure S8.** Linear sweep voltammograms for  $\alpha\text{-Fe}_2\text{O}_3$  (black) and  $\alpha\text{-Fe}_2\text{O}_{3-x}$  (red),  $5 \text{ mVs}^{-1}$ , under white light illumination using a  $75 \text{ W Xe}$  lamp (solid line, *ca.*  $10 \text{ mW cm}^{-2}$ ) and in the dark (dashed line) in  $1 \text{ M NaOH}$  with the presence of a hole scavenger ( $0.5 \text{ M H}_2\text{O}_2$ ).

## 2.9 Fitting parameters for 700 nm TA signals

Figure 6a was fitted to the following equation:

$$\Delta OD(t) = A_1 e^{-(t/\tau_1)^{\beta_1}} + A_2 e^{-(t/\tau_2)^{\beta_2}} + A_3 e^{-(t/\tau_3)^{\beta_3}} + y_0$$

| <i>Magnitude</i>                         | <i>Lifetime (s)</i>            | <i>Stretching factor</i> |
|------------------------------------------|--------------------------------|--------------------------|
| <b>A<sub>1</sub>: 2.15E<sup>-4</sup></b> | $\tau_1$ : 5.17E <sup>-4</sup> | $\beta_1$ : 0.30         |
| <b>A<sub>2</sub>: 5.78E<sup>-5</sup></b> | $\tau_2$ : 0.025               | $\beta_2$ : 0.54         |
| <b>A<sub>3</sub>: 6.06E<sup>-5</sup></b> | $\tau_3$ : 0.28                | $\beta_3$ : 0.69         |

## 2.10 Plot of photocurrent vs. 700 nm hole intensity

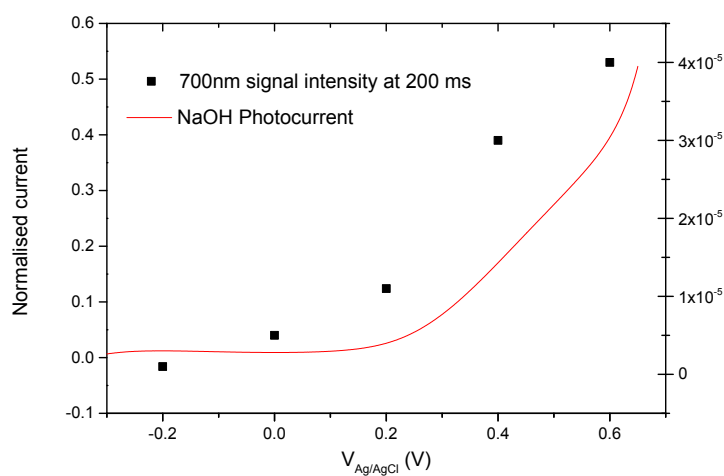

**Figure S9.** A plot of the yield of very long-lived photoholes (at 200 ms) versus the applied bias which strongly correlates with the measured photocurrent response of  $\alpha\text{-Fe}_2\text{O}_{3-x}$ .

## 2.11 Photocurrents for Al<sub>2</sub>O<sub>3</sub> coated Fe<sub>2</sub>O<sub>3</sub>

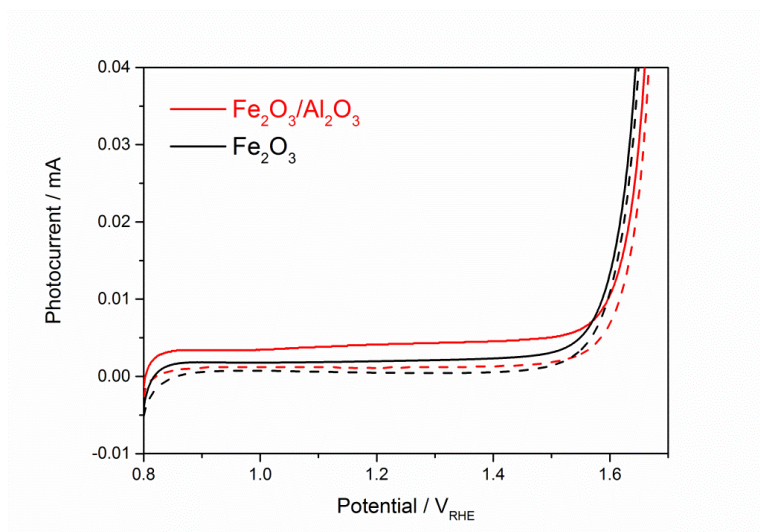

**Figure S10.** Photocurrent of  $\alpha$ -Fe<sub>2</sub>O<sub>3</sub> before (black) and after deposition of ALD Al<sub>2</sub>O<sub>3</sub> layer (1 nm, red trace) recorded using a 75 W Xe lamp, dark traces are shown as dashed lines.

Unlike in Fe<sub>2</sub>O<sub>3-x</sub>, the addition of an Al<sub>2</sub>O<sub>3</sub> ALD layer onto an air annealed  $\alpha$ -Fe<sub>2</sub>O<sub>3</sub> sample showed no improvement in activity confirming that sub-surface oxygen vacancies are required for photoelectrochemical activity in these otherwise un-doped samples.

## 2.12 Photohole (700 nm) intensities before and after Al<sub>2</sub>O<sub>3</sub> coating

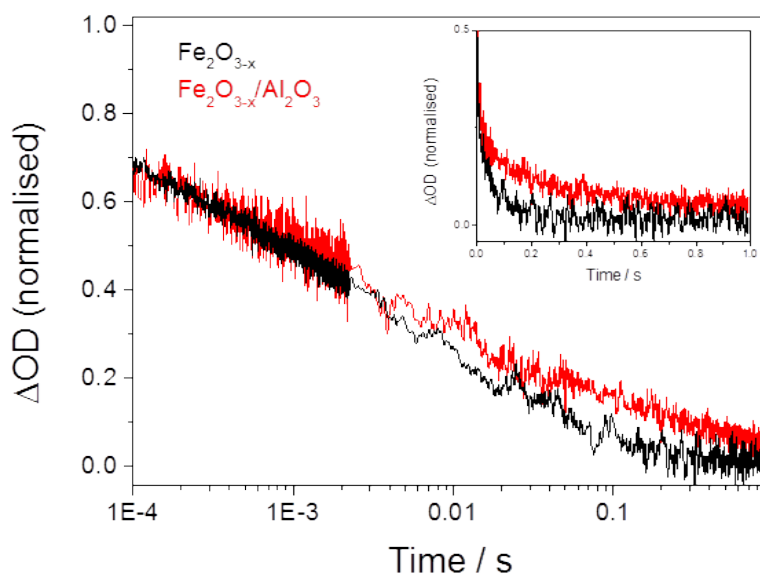

**Figure S11.** TA traces recorded at (a) 700 nm (photoholes) in  $\alpha$ -Fe<sub>2</sub>O<sub>3-x</sub> (black) and  $\alpha$ -Fe<sub>2</sub>O<sub>3-x</sub>/Al<sub>2</sub>O<sub>3</sub> at 1.4 V<sub>RHE</sub> following UV excitation (355 nm) in 1 M NaOH.

### 2.13 Fitting of TA trace recorded at (a) 700 nm (photoholes) in $\alpha\text{-Fe}_2\text{O}_3\text{-x}$ in the presence of hydrogen peroxide hole scavenger

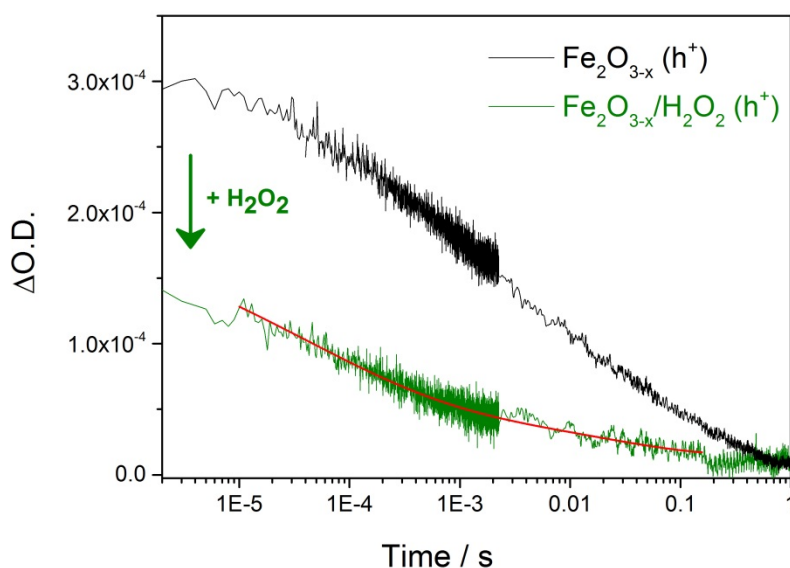

**Figure S12.** Fitting of TA trace recorded at (a) 700 nm (photoholes) in  $\alpha\text{-Fe}_2\text{O}_3\text{-x}$  in the presence of hydrogen peroxide hole scavenger at 1.4  $V_{RHE}$  following UV excitation (355 nm) in 1 M NaOH (red line on green curve).

The TA trace measured at 700 nm (holes) in the presence of hydrogen peroxide hole scavenger was found to be well fitted to a bi-exponential decay of the form.

$$\Delta OD(t) = A_1 e^{-(t/\tau_1)^{\beta_1}} + A_2 e^{-(t/\tau_2)^{\beta_2}} + y_0$$

| Magnitude                | Lifetime (s)                  | Stretching factor |
|--------------------------|-------------------------------|-------------------|
| $A_1: 1.14\text{E}^{-4}$ | $\tau_1: 3.5 \times 10^{-5}$  | $\beta_1: 0.30$   |
| $A_2: 2.73\text{E}^{-5}$ | $\tau_2: 2.58 \times 10^{-2}$ | $\beta_2: 0.54$   |

With  $A_1$  corresponding to the yield of holes undergoing bulk recombination accounting for the vast majority of the signal.  $A_2$ , the relative yield of holes undergoing trap mediated recombination is decreased compared to studies in the absence of  $\text{H}_2\text{O}_2$  (ESI 2.9), indicating a large decrease in surface hole concentration of in the presence of  $\text{H}_2\text{O}_2$ . In contrast to experiments solely in 1 M NaOH no slow hole injection term is identified. This is in agreement with past studies which suggested that scavenging of surface holes by  $\text{H}_2\text{O}_2$  is an ultrafast process, occurring on timescales faster than studied here (2  $\mu\text{s}$  - 1 s).<sup>8</sup> We are therefore able to assign that the a significant population of holes transfers to the SCLJ on the sub 2 microsecond timescale, in agreement with a recent fs-TAS study.<sup>9</sup> We note that the low

concentration of surface trapped holes remaining here likely to be due to the limited availability of H<sub>2</sub>O<sub>2</sub> at the surface proposed to be due the finite concentration of H<sub>2</sub>O<sub>2</sub> present at the electrode surface under the conditions examined (500 mM H<sub>2</sub>O<sub>2</sub> in the bulk solution).

## **References**

1. F. Le Formal, N. Tétreault, M. Cornuz, T. Moehl, M. Grätzel, and K. Sivula, *Chem. Sci.*, 2011, **2**, 737.
2. A. J. Cowan, J. Tang, W. Leng, J. R. Durrant, and D. R. Klug, *J. Phys. Chem. C*, 2010, **114**, 4208–4214.
3. S. R. Pendlebury, A. J. Cowan, M. Barroso, K. Sivula, J. Ye, M. Grätzel, D. R. Klug, J. Tang, and J. R. Durrant, *Energy Environ. Sci.*, 2012, **5**, 6304.
4. M. Barroso, S. R. Pendlebury, A. J. Cowan, and J. R. Durrant, *Chem. Sci.*, 2013, **4**, 2724.
5. K. Kobayashi, G. Okada, and J. Kumanotani, *J. Mater. Sci. Lett.*, 1988, **7**, 3–4.
6. L. Steier, I. Herraiz-cardona, S. Gimenez, F. Fabregat-santiago, J. Bisquert, S. D. Tilley, and M. Grätzel, *Adv. Funct. Mater.*, 2014, DOI: 10.1002/adfm.201402742.
7. Y. Ling, G. Wang, J. Reddy, C. Wang, J. Z. Zhang, and Y. Li, *Angew. Chem. Int. Ed. Engl.*, 2012, **51**, 4074–9.
8. K. Sivula, *J. Phys. Chem. Lett.*, 2013, **4**, 1624–1633.
9. S. R. Pendlebury, X. Wang, F. Le Formal, M. Cornuz, A. Kafizas, S. D. Tilley, M. Grätzel, and J. R. Durrant, *J. Am. Chem. Soc.*, 2014, **136**, 9854–7.
